# Supplementary material for: Is accurate and reliable blood loss estimation the 'crucial step' in early detection of postpartum haemorrhage: an integrative review of the literature
Source: Springer Nature journal article supplement (doi:10.1186/s12884-015-0653-6), 2015-09-28
Supplement: MOESM2 [file 9743392]

### Additional File 1: Characteristics of qualitative studies included after quality review

| Author /date                               | Vaate et al (2002)                                                                                                                                                                                       | Sibley et al (2007)                                                                                                                                                                                                                                                                                | Matsuyama and Moji (2008)                                                                                                                                                                                                                                                                   | Jangsten et al (2010)                                                                                                                                                                         |
|--------------------------------------------|----------------------------------------------------------------------------------------------------------------------------------------------------------------------------------------------------------|----------------------------------------------------------------------------------------------------------------------------------------------------------------------------------------------------------------------------------------------------------------------------------------------------|---------------------------------------------------------------------------------------------------------------------------------------------------------------------------------------------------------------------------------------------------------------------------------------------|-----------------------------------------------------------------------------------------------------------------------------------------------------------------------------------------------|
| <b>Code</b>                                | 1                                                                                                                                                                                                        | 2                                                                                                                                                                                                                                                                                                  | 3                                                                                                                                                                                                                                                                                           | 4                                                                                                                                                                                             |
| <b>Topic area and aims</b>                 | To assess knowledge, attitudes, practices, and role of trained Gambian traditional birth attendants (TBAs) in prevention, recognition and management of postpartum haemorrhage                           | To identify local cultural theories that women and (untrained) TBAs use to recognize and care for postpartum problems, including PPH.                                                                                                                                                              | To explore local understanding of bleeding during pregnancy and at delivery, and the meaning attached to it.                                                                                                                                                                                | To explore midwives' experiences of management of the third stage of labour and assessment of risk.                                                                                           |
| <b>Theoretical perspective</b>             | No clear theoretical perspective                                                                                                                                                                         | No clear theoretical perspective                                                                                                                                                                                                                                                                   | Grounded theory                                                                                                                                                                                                                                                                             | No clear theoretical perspective                                                                                                                                                              |
| <b>Design</b>                              | Semi-structured interview study and group discussions                                                                                                                                                    | Qualitative data collection and multivariate analysis                                                                                                                                                                                                                                              | Interview study and case histories                                                                                                                                                                                                                                                          | Focus group study                                                                                                                                                                             |
| <b>Setting and context</b>                 | Rural villages in The Gambia, West Africa                                                                                                                                                                | Rural Bangladesh                                                                                                                                                                                                                                                                                   | Rural Nepal                                                                                                                                                                                                                                                                                 | Six hospital labour wards, Sweden                                                                                                                                                             |
| <b>Sampling strategy and sampling size</b> | 22 trained TBAs and their 2 supervisors were identified in the 12 villages of interest                                                                                                                   | 20 informants from 4 groups: women of reproductive age who gave birth in 2005; women between 50 and 70 years living in extended family; trained and skilled birth attendants.                                                                                                                      | Snowball sampling                                                                                                                                                                                                                                                                           | Recruitment through the labour ward manager at each hospital. Criteria set by research team – e.g. labour ward midwifery experience for more than 15 years.                                   |
| <b>Other participant characteristics</b>   | TBAs had received 6 weeks training and attended an average of 15 births per annum. Supervisors were Government employed Community Health Nurse-Midwives and provided on-going education and supervision. | Almost all were women, parity 1-3, married, Muslim, no formal education or none beyond 5 <sup>th</sup> year. 18-70 years. Women of reproductive age younger, lower parity and reported more formal education than TBAs and elder women. TBAs had attended 10 or fewer births in the previous year. | 28 participants were interviewed 2-5 times each. Key informants, included village wise men, wise women, village health volunteers, mothers-in-law, women with small children, husbands, TBAs, traditional healers and pharmacists. They were carefully selected after an initial interview. | 32 midwives in 6 focus groups 4 had worked for less than 15 years (14,11,9,and 6 years). Participants had a total of 772 years of experience (average 24 years). Ages between 24 and 65 years |
| <b>Data collection methods</b>             | Semi-structured interviews in TBAs home for 45-60 minutes, and group discussions in a central neutral location.                                                                                          | Face-to-face interview using semi-structured questionnaire with open-ended questions. Free-listing also carried out.                                                                                                                                                                               | Semi-structured interviews using ethnographic interview guides. Also used free-listing, ranking and pile sorts                                                                                                                                                                              | Focus group discussions, tape recorded and transcribed verbatim                                                                                                                               |
| <b>Analytical approach</b>                 | Data was 'ordered' in relation to the research questions and categorised into themes                                                                                                                     | SPSS for demographic and social data. Qualitative data coded using Atlas software.                                                                                                                                                                                                                 | Content analysis                                                                                                                                                                                                                                                                            | Content analysis                                                                                                                                                                              |
| <b>Quality rating</b>                      | C                                                                                                                                                                                                        | C                                                                                                                                                                                                                                                                                                  | B                                                                                                                                                                                                                                                                                           | B                                                                                                                                                                                             |

| Author /date /country                      | Kalim et al (2009)                                                                                                   | Elmir et al (2012)                                                                                                                                 | Mapp and Hudson ( 2005)                                                                                                                                                  |  |
|--------------------------------------------|----------------------------------------------------------------------------------------------------------------------|----------------------------------------------------------------------------------------------------------------------------------------------------|--------------------------------------------------------------------------------------------------------------------------------------------------------------------------|--|
| <b>Code</b>                                | 5                                                                                                                    | 6                                                                                                                                                  | 13                                                                                                                                                                       |  |
| <b>Topic area and aims</b>                 | Explored the differences in perceived knowledge and care-seeking behaviours of women in relation to PPH or eclampsia | To describe women's experiences of having an emergency hysterectomy following a severe PPH                                                         | Women's 'lived experience' of obstetric emergencies                                                                                                                      |  |
| <b>Theoretical perspective</b>             | No clear theoretical perspective                                                                                     | Naturalistic inquiry ???                                                                                                                           | Husserlian phenomenology                                                                                                                                                 |  |
| <b>Design</b>                              | 'A mix of qualitative research methods'                                                                              | Interview study                                                                                                                                    | Interview study                                                                                                                                                          |  |
| <b>Setting and context</b>                 | Districts of Sylhet and Jessore, Bangladesh                                                                          | Australia                                                                                                                                          | NHS Hospital Trust, South West of England                                                                                                                                |  |
| <b>Sampling strategy and sampling size</b> | Respondents chosen randomly from address lists                                                                       | 21 women self-selected following a media release, posters and flyers in a range of public locations.                                               | A sample of 10 women, recruited following two local radio interviews and an advertisement in a local newspaper                                                           |  |
| <b>Other participant characteristics</b>   | Women of reproductive age (15-49 years) and elderly women (50-70 years)                                              | Age of women: 24-57 years. Time from hysterectomy to interview was 5 weeks to 28 years. 13 women had a caesarean birth, 8 women had vaginal birth. | One woman experienced eclampsia, 5 women experienced placental abruption, 7 women experienced moderate and major postpartum haemorrhage, of which 2 led to hysterectomy. |  |
| <b>Data collection methods</b>             | Free listing, rating exercises, hypothetical case scenarios and in-depth interviews                                  | Face-to-face, telephone and internet email interviews.                                                                                             | Face to face interview at a location chosen by the woman.                                                                                                                |  |
| <b>Analytical approach</b>                 | Content analysis and ranking                                                                                         | 'Data inductively analysed'                                                                                                                        | Colaizzi's method                                                                                                                                                        |  |
| <b>Quality rating</b>                      | B                                                                                                                    | A/B                                                                                                                                                | C/D                                                                                                                                                                      |  |
